# Supplementary material for: Ionotropic Receptor-dependent moist and dry cells control hygrosensation in Drosophila
Source: eLife. 2017 Jun 16;6:e26654. doi: 10.7554/eLife.26654 (PMC5495567; doi:10.7554/eLife.26654)
Supplement: Figure 2—source data 1. — Calcium imaging results used to create Figure 2 summary graphs. DOI: http://dx.doi.org/10.7554/eLife.26654.005 [file elife-26654-fig2-data1.xlsx]

## Sheet: Panels c and d, Ir68a-Gal4
					stimulus	Genotype	deltaF/F0	chromosomal location of UAS-GCaMP6m insert		stimulus	Genotype	deltaF/F0	chromosomal location of UAS-GCaMP6m insert		stimulus	Genotype	deltaF/F0	chromosomal location of UAS-GCaMP6m insert		stimulus	Genotype	deltaF/F0	chromosomal location of UAS-GCaMP6m insert
					Dry to Moist	Ir68agal4,Ir93aMIC, UAS-Ir93a	1.3846	2nd		Moist to Dry	Ir68agal4,Ir93aMIC, UAS-Ir93a	-0.608258	2nd		Dry to Moist	Wild Type (68a-Gal4;UAS-GCaMP6 on III)	0.397168	3rd		Moist to Dry	Wild Type (68a-Gal4;UAS-GCaMP6 on III)	-0.335367	3rd
					Dry to Moist	Ir68agal4,Ir93aMIC, UAS-Ir93a	0.702042	2nd		Moist to Dry	Ir68agal4,Ir93aMIC, UAS-Ir93a	-0.38686	2nd		Dry to Moist	Wild Type (68a-Gal4;UAS-GCaMP6 on III)	0.827614	3rd		Moist to Dry	Wild Type (68a-Gal4;UAS-GCaMP6 on III)	-0.387569	3rd
					Dry to Moist	Ir68agal4,Ir93aMIC, UAS-Ir93a	0.622425	2nd		Moist to Dry	Ir68agal4,Ir93aMIC, UAS-Ir93a	-0.348967	2nd		Dry to Moist	Wild Type (68a-Gal4;UAS-GCaMP6 on III)	2.05296	3rd		Moist to Dry	Wild Type (68a-Gal4;UAS-GCaMP6 on III)	-0.755678	3rd
					Dry to Moist	Ir68agal4,Ir93aMIC, UAS-Ir93a	0.448428	2nd		Moist to Dry	Ir68agal4,Ir93aMIC, UAS-Ir93a	-0.287413	2nd		Dry to Moist	Wild Type (68a-Gal4;UAS-GCaMP6 on III)	1.24154	3rd		Moist to Dry	Wild Type (68a-Gal4;UAS-GCaMP6 on III)	-0.603262	3rd
					Dry to Moist	Ir68agal4,Ir93aMIC, UAS-Ir93a	0.808505	2nd		Moist to Dry	Ir68agal4,Ir93aMIC, UAS-Ir93a	-0.492824	2nd		Dry to Moist	Wild Type (68a-Gal4;UAS-GCaMP6 on III)	1.03175	3rd		Moist to Dry	Wild Type (68a-Gal4;UAS-GCaMP6 on III)	-0.48619	3rd
					Dry to Moist	Ir68agal4,Ir93aMIC, UAS-Ir93a	0.924363	2nd		Moist to Dry	Ir68agal4,Ir93aMIC, UAS-Ir93a	-0.427772	2nd		Dry to Moist	Wild Type (68a-Gal4;UAS-GCaMP6 on III)	0.940862	3rd		Moist to Dry	Wild Type (68a-Gal4;UAS-GCaMP6 on III)	-0.545829	3rd
					Dry to Moist	Ir68aGal4,Ir93aMIC	0.0525665	2nd		Moist to Dry	Ir68aGal4,Ir93aMIC	-0.105565	2nd		Dry to Moist	Wild Type (68a-Gal4;UAS-GCaMP6 on III)	0.78506	3rd		Moist to Dry	Wild Type (68a-Gal4;UAS-GCaMP6 on III)	-0.465033	3rd
					Dry to Moist	Ir68aGal4,Ir93aMIC	0.0531044	2nd		Moist to Dry	Ir68aGal4,Ir93aMIC	-0.072441	2nd		Dry to Moist	Wild Type (68a-Gal4;UAS-GCaMP6 on III)	0.958023	3rd		Moist to Dry	Wild Type (68a-Gal4;UAS-GCaMP6 on III)	-0.570599	3rd
					Dry to Moist	Ir68aGal4,Ir93aMIC	-0.052646	2nd		Moist to Dry	Ir68aGal4,Ir93aMIC	0.0341279	2nd		Dry to Moist	Wild Type (68a-Gal4;UAS-GCaMP6 on III)	0.310036	3rd		Moist to Dry	Wild Type (68a-Gal4;UAS-GCaMP6 on III)	-0.355013	3rd
					Dry to Moist	Ir68aGal4,Ir93aMIC	0.0511213	2nd		Moist to Dry	Ir68aGal4,Ir93aMIC	-0.00483859	2nd		Dry to Moist	Wild Type (68a-Gal4;UAS-GCaMP6 on III)	1.03805	3rd		Moist to Dry	Wild Type (68a-Gal4;UAS-GCaMP6 on III)	-0.439414	3rd
					Dry to Moist	Ir68aGal4,Ir93aMIC	-0.00267664	2nd		Moist to Dry	Ir68aGal4,Ir93aMIC	-0.0316093	2nd		Dry to Moist	Ir40a1; Ir68Gal4	0.666187	3rd		Moist to Dry	Ir40a1; Ir68Gal4	-0.45426	3rd
					Dry to Moist	Ir68aGal4,Ir93aMIC	0.030574	2nd		Moist to Dry	Ir68aGal4,Ir93aMIC	-0.0472365	2nd		Dry to Moist	Ir40a1; Ir68Gal4	1.1715	3rd		Moist to Dry	Ir40a1; Ir68Gal4	-0.625219	3rd
					Dry to Moist	Ir68aGal4,Ir93aMIC	-0.140388	2nd		Moist to Dry	Ir68aGal4,Ir93aMIC	0.290044	2nd		Dry to Moist	Ir40a1; Ir68Gal4	0.215054	3rd		Moist to Dry	Ir40a1; Ir68Gal4	-0.245567	3rd
					Dry to Moist	Ir68aGal4,Ir93aMIC	-0.0163905	2nd		Moist to Dry	Ir68aGal4,Ir93aMIC	0.0406673	2nd		Dry to Moist	Ir40a1; Ir68Gal4	1.40665	3rd		Moist to Dry	Ir40a1; Ir68Gal4	-0.671648	3rd
					Dry to Moist	68aGenomic;Ir68agal4,Ir68aPBac	0.331992	2nd		Moist to Dry	68aGenomic;Ir68agal4,Ir68aPBac	-0.27082	2nd		Dry to Moist	Ir40a1; Ir68Gal4	0.315018	3rd		Moist to Dry	Ir40a1; Ir68Gal4	-0.385284	3rd
					Dry to Moist	68aGenomic;Ir68agal4,Ir68aPBac	0.333864	2nd		Moist to Dry	68aGenomic;Ir68agal4,Ir68aPBac	-0.327331	2nd		Dry to Moist	Ir40a1; Ir68Gal4	0.429863	3rd		Moist to Dry	Ir40a1; Ir68Gal4	-0.49676	3rd
					Dry to Moist	68aGenomic;Ir68agal4,Ir68aPBac	0.483672	2nd		Moist to Dry	68aGenomic;Ir68agal4,Ir68aPBac	-0.358007	2nd		Dry to Moist	Ir40a1; Ir68Gal4	0.451725	3rd		Moist to Dry	Ir40a1; Ir68Gal4	-0.0697678	3rd
					Dry to Moist	68aGenomic;Ir68agal4,Ir68aPBac	0.461355	2nd		Moist to Dry	68aGenomic;Ir68agal4,Ir68aPBac	-0.212384	2nd		Dry to Moist	Ir40a1; Ir68Gal4	0.807526	3rd		Moist to Dry	Ir40a1; Ir68Gal4	-0.446713	3rd
					Dry to Moist	68aGenomic;Ir68agal4,Ir68aPBac	0.328632	2nd		Moist to Dry	68aGenomic;Ir68agal4,Ir68aPBac	-0.259434	2nd		Dry to Moist	Ir25a2;Ir68aGal4	-0.0904597	3rd		Moist to Dry	Ir25a2;Ir68aGal4	0.0177927	3rd
					Dry to Moist	68aGenomic;Ir68agal4,Ir68aPBac	0.344028	2nd		Moist to Dry	68aGenomic;Ir68agal4,Ir68aPBac	-0.301816	2nd		Dry to Moist	Ir25a2;Ir68aGal4	0.0324242	3rd		Moist to Dry	Ir25a2;Ir68aGal4	0.10625	3rd
					Dry to Moist	68aGenomic;Ir68agal4,Ir68aPBac	1.25825	2nd		Moist to Dry	68aGenomic;Ir68agal4,Ir68aPBac	-0.51566	2nd		Dry to Moist	Ir25a2;Ir68aGal4	0.00432708	3rd		Moist to Dry	Ir25a2;Ir68aGal4	0.024604	3rd
					Dry to Moist	68aGenomic;Ir68agal4,Ir68aPBac	0.605362	2nd		Moist to Dry	68aGenomic;Ir68agal4,Ir68aPBac	-0.343046	2nd		Dry to Moist	Ir25a2;Ir68aGal4	-0.0211379	3rd		Moist to Dry	Ir25a2;Ir68aGal4	0.0621357	3rd
					Dry to Moist	Ir68Gal4;Ir68aPBac	-0.0715346	2nd		Moist to Dry	Ir68Gal4;Ir68aPBac	0.181383	2nd		Dry to Moist	Ir25a2;Ir68aGal4	-0.0377908	3rd		Moist to Dry	Ir25a2;Ir68aGal4	-0.0233165	3rd
					Dry to Moist	Ir68Gal4;Ir68aPBac	-0.19033	2nd		Moist to Dry	Ir68Gal4;Ir68aPBac	-0.0266909	2nd		Dry to Moist	Ir25a2;Ir68aGal4	-0.0110981	3rd		Moist to Dry	Ir25a2;Ir68aGal4	0.070003	3rd
					Dry to Moist	Ir68Gal4;Ir68aPBac	-0.175055	2nd		Moist to Dry	Ir68Gal4;Ir68aPBac	0.0315981	2nd		Dry to Moist	Ir25a2;Ir68aGal4	-0.0589969	3rd		Moist to Dry	Ir25a2;Ir68aGal4	0.085091	3rd
					Dry to Moist	Ir68Gal4;Ir68aPBac	-0.0487612	2nd		Moist to Dry	Ir68Gal4;Ir68aPBac	-0.00648519	2nd		Dry to Moist	Ir25a2;Ir68aGal4	0.0343639	3rd		Moist to Dry	Ir25a2;Ir68aGal4	0.150282	3rd
					Dry to Moist	Ir68Gal4;Ir68aPBac	0.0078634	2nd		Moist to Dry	Ir68Gal4;Ir68aPBac	0.0519182	2nd		Dry to Moist	Ir25a2,BAC;Ir68aGal4	0.400823	3rd		Moist to Dry	Ir25a2,BAC;Ir68aGal4	-0.417614	3rd
					Dry to Moist	Ir68Gal4;Ir68aPBac	-0.111731	2nd		Moist to Dry	Ir68Gal4;Ir68aPBac	0.0415317	2nd		Dry to Moist	Ir25a2,BAC;Ir68aGal4	0.466348	3rd		Moist to Dry	Ir25a2,BAC;Ir68aGal4	-0.572658	3rd
					Dry to Moist	Ir68Gal4;Ir68aPBac	-0.0235795	2nd		Moist to Dry	Ir68Gal4;Ir68aPBac	-0.115561	2nd		Dry to Moist	Ir25a2,BAC;Ir68aGal4	0.204169	3rd		Moist to Dry	Ir25a2,BAC;Ir68aGal4	-0.158006	3rd
					Dry to Moist	Ir68Gal4;Ir68aPBac	-0.0632093	2nd		Moist to Dry	Ir68Gal4;Ir68aPBac	-0.0557498	2nd		Dry to Moist	Ir25a2,BAC;Ir68aGal4	0.458843	3rd		Moist to Dry	Ir25a2,BAC;Ir68aGal4	-0.584092	3rd
					Dry to Moist	Ir68Gal4;Ir68aPBac	0.0586529	2nd		Moist to Dry	Ir68Gal4;Ir68aPBac	-0.00788566	2nd		Dry to Moist	Ir25a2,BAC;Ir68aGal4	0.361573	3rd		Moist to Dry	Ir25a2,BAC;Ir68aGal4	-0.522898	3rd
					Dry to Moist	ir68a-gal4;Gacamp6 fixed (II)	0.481072	2nd		Moist to Dry	ir68a-gal4;Gacamp6 fixed (II)	-0.40696	2nd		Dry to Moist	Ir25a2,BAC;Ir68aGal4	0.595858	3rd		Moist to Dry	Ir25a2,BAC;Ir68aGal4	-0.491278	3rd
					Dry to Moist	ir68a-gal4;Gacamp6 fixed (II)	0.314154	2nd		Moist to Dry	ir68a-gal4;Gacamp6 fixed (II)	-0.459885	2nd		Dry to Moist	Ir25a2,BAC;Ir68aGal4	0.427518	3rd		Moist to Dry	Ir25a2,BAC;Ir68aGal4	-0.438879	3rd
					Dry to Moist	ir68a-gal4;Gacamp6 fixed (II)	0.210629	2nd		Moist to Dry	ir68a-gal4;Gacamp6 fixed (II)	-0.346366	2nd		Dry to Moist	Ir25a2,BAC;Ir68aGal4	0.574212	3rd		Moist to Dry	Ir25a2,BAC;Ir68aGal4	-0.470835	3rd
					Dry to Moist	ir68a-gal4;Gacamp6 fixed (II)	0.0609942	2nd		Moist to Dry	ir68a-gal4;Gacamp6 fixed (II)	-0.391005	2nd
					Dry to Moist	ir68a-gal4;Gacamp6 fixed (II)	0.225829	2nd		Moist to Dry	ir68a-gal4;Gacamp6 fixed (II)	-0.229984	2nd
					Dry to Moist	ir68a-gal4;Gacamp6 fixed (II)	0.413651	2nd		Moist to Dry	ir68a-gal4;Gacamp6 fixed (II)	-0.724573	2nd
					Dry to Moist	ir68a-gal4;Gacamp6 fixed (II)	0.360586	2nd		Moist to Dry	ir68a-gal4;Gacamp6 fixed (II)	-0.302564	2nd
							Dry to Moist	Dry to Moist	Dry to Moist	Dry to Moist	Dry to Moist			Dry to Moist	Dry to Moist	Dry to Moist	Dry to Moist
							2nd	2nd	2nd	2nd	2nd			3rd	3rd	3rd	3rd
							Ir68agal4,Ir93aMIC, UAS-Ir93a	Ir68aGal4,Ir93aMIC	68aGenomic;Ir68agal4,Ir68aPBac	Ir68Gal4;Ir68aPBac	ir68a-gal4;Gacamp6 fixed (II)			Ir40a1; Ir68Gal4	Ir25a2,BAC;Ir68aGal4	Ir25a2;Ir68aGal4	Wild Type (68a-Gal4;UAS-GCaMP6 on III)
							1.3846	0.0525665	0.331992	-0.0715346	0.481072			0.666187	0.400823	-0.0904597	0.397168
							0.702042	0.0531044	0.333864	-0.19033	0.314154			1.1715	0.466348	0.0324242	0.827614
							0.622425	-0.052646	0.483672	-0.175055	0.210629			0.215054	0.204169	0.00432708	2.05296
							0.448428	0.0511213	0.461355	-0.0487612	0.0609942			1.40665	0.458843	-0.0211379	1.24154
							0.808505	-0.00267664	0.328632	0.0078634	0.225829			0.315018	0.361573	-0.0377908	1.03175
							0.924363	0.030574	0.344028	-0.111731	0.413651			0.429863	0.595858	-0.0110981	0.940862
								-0.140388	1.25825	-0.0235795	0.360586			0.451725	0.427518	-0.0589969	0.78506
								-0.0163905	0.605362	-0.0632093				0.807526	0.574212	0.0343639	0.958023
										0.0586529							0.310036
																	1.03805
							Moist to Dry	Moist to Dry	Moist to Dry	Moist to Dry	Moist to Dry			Moist to Dry	Moist to Dry	Moist to Dry	Moist to Dry
							2nd	2nd	2nd	2nd	2nd			3rd	3rd	3rd	3rd
							Ir68agal4,Ir93aMIC, UAS-Ir93a	Ir68aGal4,Ir93aMIC	68aGenomic;Ir68agal4,Ir68aPBac	Ir68Gal4;Ir68aPBac	ir68a-gal4;Gacamp6 fixed (II)			Ir40a1; Ir68Gal4	Ir25a2,BAC;Ir68aGal4	Ir25a2;Ir68aGal4	Wild Type (68a-Gal4;UAS-GCaMP6 on III)
							-0.608258	-0.105565	-0.27082	0.181383	-0.40696			-0.45426	-0.417614	0.0177927	-0.335367
							-0.38686	-0.072441	-0.327331	-0.0266909	-0.459885			-0.625219	-0.572658	0.10625	-0.387569
							-0.348967	0.0341279	-0.358007	0.0315981	-0.346366			-0.245567	-0.158006	0.024604	-0.755678
							-0.287413	-0.00483859	-0.212384	-0.00648519	-0.391005			-0.671648	-0.584092	0.0621357	-0.603262
							-0.492824	-0.0316093	-0.259434	0.0519182	-0.229984			-0.385284	-0.522898	-0.0233165	-0.48619
							-0.427772	-0.0472365	-0.301816	0.0415317	-0.724573			-0.49676	-0.491278	0.070003	-0.545829
								0.290044	-0.51566	-0.115561	-0.302564			-0.0697678	-0.438879	0.085091	-0.465033
								0.0406673	-0.343046	-0.0557498				-0.446713	-0.470835	0.150282	-0.570599
										-0.00788566							-0.355013
																	-0.439414

## Sheet: Panels e and f, Ir40a-Gal4 arm
		stimulus	Genotype	deltaF/F0			Dry to Moist				Moist to Dry
		Dry to Moist	Ir40aGal4 (GCAMP on 2)	-0.408433			Ir40aGal4;Ir68aPBac (GCAMP ON 2)	Ir40aGal4 (GCAMP on 2)			Ir40aGal4;Ir68aPBac (GCAMP ON 2)	Ir40aGal4 (GCAMP on 2)
		Dry to Moist	Ir40aGal4 (GCAMP on 2)	-0.442063			-0.310934	-0.408433			0.615818	2.16743
		Dry to Moist	Ir40aGal4 (GCAMP on 2)	-0.422695			-0.376451	-0.442063			0.776013	1.43991
		Dry to Moist	Ir40aGal4 (GCAMP on 2)	-0.291167			-0.376451	-0.422695			0.776013	0.933016
		Dry to Moist	Ir40aGal4 (GCAMP on 2)	-0.379924			-0.417291	-0.291167			0.950337	0.480074
		Dry to Moist	Ir40aGal4 (GCAMP on 2)	-0.333126			-0.540995	-0.379924			1.0303	0.497456
		Dry to Moist	Ir40aGal4 (GCAMP on 2)	-0.360007			-0.403053	-0.333126			1.4737	0.631835
		Dry to Moist	Ir40aGal4 (GCAMP on 2)	-0.282889			-0.43408	-0.360007			0.936333	0.48797
		Dry to Moist	Ir40aGal4 (GCAMP on 2)	-0.294513			-0.438247	-0.282889			0.847451	0.525319
		Dry to Moist	Ir40aGal4;Ir68aPBac (GCAMP ON 2)	-0.310934			-0.503125	-0.294513			0.672413	0.410596
		Dry to Moist	Ir40aGal4;Ir68aPBac (GCAMP ON 2)	-0.376451
		Dry to Moist	Ir40aGal4;Ir68aPBac (GCAMP ON 2)	-0.376451
		Dry to Moist	Ir40aGal4;Ir68aPBac (GCAMP ON 2)	-0.417291
		Dry to Moist	Ir40aGal4;Ir68aPBac (GCAMP ON 2)	-0.540995
		Dry to Moist	Ir40aGal4;Ir68aPBac (GCAMP ON 2)	-0.403053
		Dry to Moist	Ir40aGal4;Ir68aPBac (GCAMP ON 2)	-0.43408
		Dry to Moist	Ir40aGal4;Ir68aPBac (GCAMP ON 2)	-0.438247
		Dry to Moist	Ir40aGal4;Ir68aPBac (GCAMP ON 2)	-0.503125
		Moist to Dry	Ir40aGal4 (GCAMP on 2)	2.16743
		Moist to Dry	Ir40aGal4 (GCAMP on 2)	1.43991
		Moist to Dry	Ir40aGal4 (GCAMP on 2)	0.933016
		Moist to Dry	Ir40aGal4 (GCAMP on 2)	0.480074
		Moist to Dry	Ir40aGal4 (GCAMP on 2)	0.497456
		Moist to Dry	Ir40aGal4 (GCAMP on 2)	0.631835
		Moist to Dry	Ir40aGal4 (GCAMP on 2)	0.48797
		Moist to Dry	Ir40aGal4 (GCAMP on 2)	0.525319
		Moist to Dry	Ir40aGal4 (GCAMP on 2)	0.410596
		Moist to Dry	Ir40aGal4;Ir68aPBac (GCAMP ON 2)	0.615818
		Moist to Dry	Ir40aGal4;Ir68aPBac (GCAMP ON 2)	0.776013
		Moist to Dry	Ir40aGal4;Ir68aPBac (GCAMP ON 2)	0.776013
		Moist to Dry	Ir40aGal4;Ir68aPBac (GCAMP ON 2)	0.950337
		Moist to Dry	Ir40aGal4;Ir68aPBac (GCAMP ON 2)	1.0303
		Moist to Dry	Ir40aGal4;Ir68aPBac (GCAMP ON 2)	1.4737
		Moist to Dry	Ir40aGal4;Ir68aPBac (GCAMP ON 2)	0.936333
		Moist to Dry	Ir40aGal4;Ir68aPBac (GCAMP ON 2)	0.847451
		Moist to Dry	Ir40aGal4;Ir68aPBac (GCAMP ON 2)	0.672413
