# Supplementary material for: Ionotropic Receptor-dependent moist and dry cells control hygrosensation in Drosophila
Source: eLife. 2017 Jun 16;6:e26654. doi: 10.7554/eLife.26654 (PMC5495567; doi:10.7554/eLife.26654)
Supplement: Figure 3—source data 1. — Primary hygrotaxis behavior data for Figure 3. DOI: http://dx.doi.org/10.7554/eLife.26654.007 [file elife-26654-fig3-data1.xlsx]

## Sheet: FIg. 3 No Desiccation
genotype	# on moist side	# on dry side	PI
W1118	4	21	0.68
W1118	3	18	0.714286
W1118	4	26	0.733333
W1118	6	22	0.571429
W1118	5	25	0.666667
W1118	4	28	0.75
W1118	5	26	0.677419
W1118	8	24	0.5
W1118	8	23	0.483871
W1118	7	23	0.533333
W1118	4	28	0.75
W1118	6	25	0.612903
Ir93aMIC	13	16	0.103448
Ir93aMIC	8	22	0.466667
Ir93aMIC	6	22	0.571429
Ir93aMIC	12	14	0.0769231
Ir93aMIC	11	17	0.214286
Ir93aMIC	15	12	-0.111111
Ir93aMIC	18	11	-0.241379
Ir93aMIC	20	11	-0.290323
Ir93aMIC	16	15	-0.0322581
Ir93aMIC	13	17	0.133333
Ir93aMIC	14	15	0.0344828
Ir68aPBac	11	19	0.266667
Ir68aPBac	12	15	0.111111
Ir68aPBac	7	24	0.548387
Ir68aPBac	8	16	0.333333
Ir68aPBac	10	19	0.310345
Ir68aPBac	4	24	0.714286
Ir68aPBac	16	14	-0.0666667
Ir68aPBac	7	23	0.533333
Ir68aPBac	21	11	-0.3125
Ir68aPBac	14	15	0.0344828
Ir68aPBac	21	9	-0.4
Ir68aPBac	19	10	-0.310345
Ir68aPBac	14	13	-0.037037
Ir68aPBac	14	15	0.0344828
Ir68aPBac	12	20	0.25
Ir68aPBac	8	22	0.466667
Ir68aMI	16	12	-0.142857
Ir68aMI	13	16	0.103448
Ir68aMI	14	13	-0.037037
Ir68aMI	10	19	0.310345
Ir68aMI	21	5	-0.615385
Ir68aMI	7	20	0.481481
Ir68aMI	9	15	0.25
Ir68aMI	5	25	0.666667
Ir68aMI	10	16	0.230769
Ir68aMI	6	23	0.586207
Ir68aMI	12	17	0.172414
Ir68aMI	12	16	0.142857
Ir68aMI	1	31	0.9375
Ir68aMI	18	12	-0.2
Ir68agenomic;Ir68aMI	11	25	0.388889
Ir68agenomic;Ir68aMI	10	26	0.444444
Ir68agenomic;Ir68aMI	5	26	0.677419
Ir68agenomic;Ir68aMI	8	21	0.448276
Ir68agenomic;Ir68aMI	12	10	-0.0909091
Ir68agenomic;Ir68aMI	8	25	0.515152
Ir68agenomic;Ir68aMI	3	29	0.8125
Ir68agenomic;Ir68aMI	5	24	0.655172
Ir68agenomic;Ir68aMI	6	25	0.612903
Ir68agenomic;Ir68aMI	4	20	0.666667
Ir68agenomic;Ir68aMI	3	19	0.727273
Ir68agenomic;Ir68aMI	6	24	0.6
Ir40a1; Ir68aMI	15	10	-0.2
Ir40a1; Ir68aMI	20	6	-0.538462
Ir40a1; Ir68aMI	13	15	0.0714286
Ir40a1; Ir68aMI	10	19	0.310345
Ir40a1; Ir68aMI	15	13	-0.0714286
Ir40a1; Ir68aMI	11	13	0.0833333
Ir40a1; Ir68aMI	10	12	0.0909091
Ir40a1; Ir68aMI	14	14	0
Ir40a1; Ir68aMI	12	18	0.2
Ir40a1; Ir68aMI	14	15	0.0344828
Ir40a1; Ir68aMI	10	19	0.310345
Ir40a1; Ir68aMI	20	10	-0.333333
Ir40a1; Ir68aMI	12	17	0.172414
Ir40a1; Ir68aMI	18	11	-0.241379
Ir40a1; Ir68aMI	15	12	-0.111111
Ir40a1	6	21	0.555556
Ir40a1	2	26	0.857143
Ir40a1	14	16	0.0666667
Ir40a1	14	18	0.125
Ir40a1	12	18	0.2
Ir40a1	10	17	0.259259
Ir40a1	13	12	-0.04
Ir40a1	14	12	-0.0769231
Ir40a1	20	8	-0.428571
Ir40a1	11	14	0.12
Ir40a1	10	21	0.354839
Ir40a1	13	16	0.103448
Ir40a1	10	20	0.333333
Ir40a1	5	26	0.677419
Ir40a1	16	15	-0.0322581
Ir25a2	10	19	0.310345
Ir25a2	20	13	-0.212121
Ir25a2	23	8	-0.483871
Ir25a2	12	16	0.142857
Ir25a2	8	21	0.448276
Ir25a2	10	15	0.2
Ir25a2	11	22	0.333333
Ir25a2	11	20	0.290323
Ir25a2	8	20	0.428571
Ir25a2	12	15	0.111111
Ir25a2	28	4	-0.75
Ir25a2	15	16	0.0322581
