# Supplementary material for: Ionotropic Receptor-dependent moist and dry cells control hygrosensation in Drosophila
Source: eLife. 2017 Jun 16;6:e26654. doi: 10.7554/eLife.26654 (PMC5495567; doi:10.7554/eLife.26654)
Supplement: Figure 4—source data 1. — Primary hygrotaxis behavior data for Figure 4. DOI: http://dx.doi.org/10.7554/eLife.26654.009 [file elife-26654-fig4-data1.xlsx]

## Sheet: FIg. 4 Post Desiccation
genotype	# on moist side	# on dry side	PI
W1118	28	3	-0.806452
W1118	31	4	-0.771429
W1118	30	2	-0.875
W1118	30	2	-0.875
W1118	26	4	-0.733333
W1118	23	4	-0.703704
W1118	9	2	-0.636364
W1118	26	1	-0.925926
W1118	25	3	-0.785714
W1118	25	4	-0.724138
W1118	27	3	-0.8
W1118	29	2	-0.870968
W1118	27	1	-0.928571
W1118	25	5	-0.666667
W1118	27	3	-0.8
Ir93aMIC	11	21	0.3125
Ir93aMIC	14	15	0.0344828
Ir93aMIC	16	14	-0.0666667
Ir93aMIC	17	7	-0.416667
Ir93aMIC	17	12	-0.172414
Ir93aMIC	15	12	-0.111111
Ir93aMIC	16	13	-0.103448
Ir93aMIC	17	13	-0.133333
Ir93aMIC	15	13	-0.0714286
Ir93aMIC	11	17	0.214286
Ir93aMIC	14	15	0.0344828
Ir93aMIC	10	15	0.2
Ir93aMIC	20	8	-0.428571
Ir93aMIC	14	11	-0.12
Ir68aMI	24	6	-0.6
Ir68aMI	24	3	-0.777778
Ir68aMI	24	5	-0.655172
Ir68aMI	23	4	-0.703704
Ir68aMI	21	3	-0.75
Ir68aMI	25	3	-0.785714
Ir68aMI	28	1	-0.931034
Ir68aMI	24	4	-0.714286
Ir68aMI	32	1	-0.939394
Ir68aMI	24	4	-0.714286
Ir68aMI	22	4	-0.692308
Ir40a1	14	4	-0.555556
Ir40a1	14	5	-0.473684
Ir40a1	16	3	-0.684211
Ir40a1	17	1	-0.888889
Ir40a1	18	2	-0.8
Ir40a1	21	3	-0.75
Ir40a1	20	6	-0.538462
Ir40a1	16	13	-0.103448
Ir40a1	19	11	-0.266667
Ir40a1	24	9	-0.454545
Ir40a1	23	8	-0.483871
Ir40a1	13	17	0.133333
IR40a, 68a[M1]	10	9	-0.0526316
IR40a, 68a[M1]	5	19	0.583333
IR40a, 68a[M1]	4	17	0.619048
IR40a, 68a[M1]	9	19	0.357143
IR40a, 68a[M1]	13	17	0.133333
IR40a, 68a[M1]	17	13	-0.133333
IR40a, 68a[M1]	12	19	0.225806
IR40a, 68a[M1]	15	14	-0.0344828
IR40a, 68a[M1]	20	7	-0.481481
IR40a, 68a[M1]	16	11	-0.185185
IR40a, 68a[M1]	9	16	0.28
IR40a, 68a[M1]	13	13	0
Ir25a2	14	17	0.0967742
Ir25a2	16	14	-0.0666667
Ir25a2	20	9	-0.37931
Ir25a2	14	17	0.0967742
Ir25a2	12	21	0.272727
Ir25a2	18	13	-0.16129
Ir25a2	13	12	-0.04
Ir25a2	12	13	0.04
Ir25a2	14	13	-0.037037
Ir25a2	13	12	-0.04
Ir25a2	9	16	0.28
Ir25a2	12	14	0.0769231
Ir25a2	9	12	0.142857
