# Supplementary figures and images for: Ionotropic Receptor-dependent moist and dry cells control hygrosensation in Drosophila
Source: eLife journal article supplement (doi:10.7554/elife.26654), 2017-06-16

Figure 1 - supplement 1

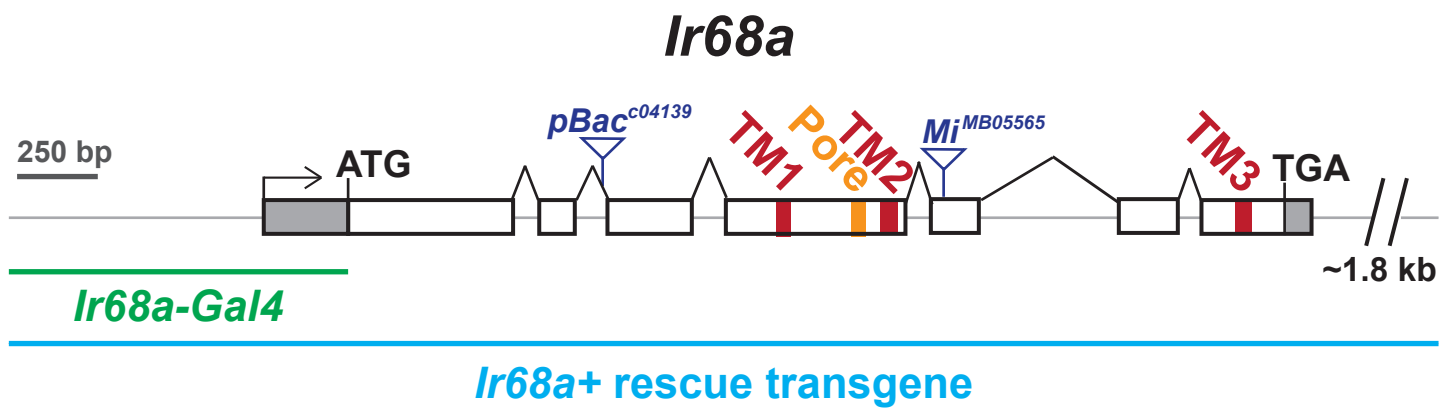

Supplement: supp [file elife_poa_e26654_Figure_1_figure_Supplement_1.pdf › elife_poa_e26654_Figure_1_figure_Supplement_1.pdf]
